# Supplementary material for: Acidic mammalian chitinase is a proteases-resistant glycosidase in mouse digestive system
Source: PubMed Central journal article supplement (PMC5121897; doi:10.1038/srep37756), 2016-11-24
Supplement: srep37756-s1.pdf [file srep37756-s1.pdf]

## Supplementary Information

### **Acidic mammalian chitinase is a proteases-resistant glycosidase in mouse digestive system**

Misa Ohno<sup>1,†</sup>, Masahiro Kimura<sup>1,†</sup>, Haruko Miyazaki<sup>2,3,4,†</sup>, Kazuaki Okawa<sup>1</sup>, Riho Onuki<sup>1</sup>, Chiyuki Nemoto<sup>1</sup>, Eri Tabata<sup>1</sup>, Satoshi Wakita<sup>1</sup>, Akinori Kashimura<sup>1</sup>, Masayoshi Sakaguchi<sup>1</sup>, Yasusato Sugahara<sup>1</sup>, Nobuyuki Nukina<sup>2,3,4</sup>, Peter O. Bauer<sup>5</sup> and Fumitaka Oyama<sup>1,\*</sup>

<sup>1</sup>Department of Chemistry and Life Science, Kogakuin University, Hachioji, Tokyo 192-0015, Japan, <sup>2</sup>Laboratory for Structural Neuropathology, RIKEN Brain Science Institute, Wako, Saitama 351-0198, Japan, <sup>3</sup>Department of Neuroscience for Neurodegenerative Disorders, Juntendo University Graduate School of Medicine, Tokyo 113-8421, Japan, <sup>4</sup>Laboratory of Structural Neuropathology, Doshisha University Graduate School of Brain Science, Kyotanabe-shi, Kyoto 610-0394 Japan and <sup>5</sup>Department of Neuroscience, Mayo Clinic, Jacksonville, FL 32224, USA

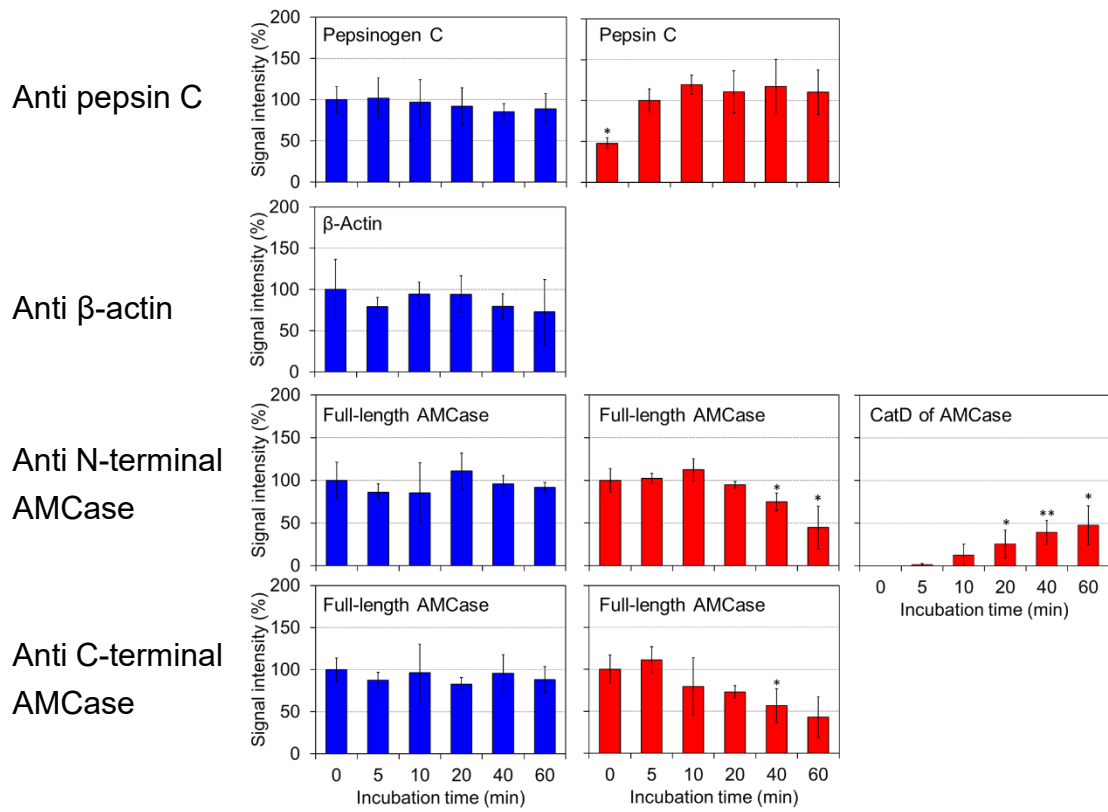

Supplementary Fig. S1. Changes of protein levels in the Western blot in Fig. 1c. Soluble proteins obtained from mouse stomach were incubated at pH 7.6 (blue bars) or 2.0 (red bars) and carried out Western blot analysis as described in the Fig. 1c. The signal intensities were quantified as described in the Materials and Methods. The signal intensities of pepsinogen C (pH 7.6),  $\beta$ -actin (pH 7.6) and full length AMCase (pH 7.6 and 2.0) at incubated 0 min were defined as 100%. The signal intensity of pepsin (pH 2.0) at incubated 5 min. CatD of AMCase were calculated as 100% at incubated 0 min of full length. as 100%. Values represent mean  $\pm$  SD conducted in triplicate. \* $p < 0.05$ , \*\* $p < 0.01$ . P-values were determined using Student's t-test.

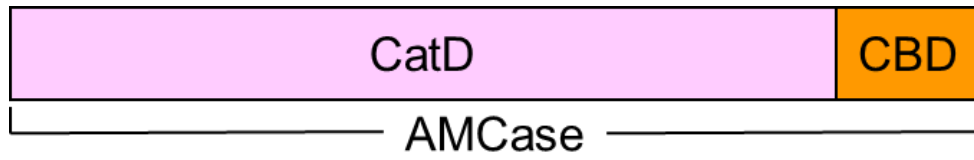

Supplementary Fig. S2. Schematic representation of mouse AMCase protein. Mouse AMCase is composed of an N-terminal catalytic domain (CatD) and a C-terminal chitin binding domain (CBD).

YNLICYFTNWAQYRPGLGSFKPDDINPCLCTHLYAFAGMQNNEITTEWNDV  
TLYK**AFNDLKNRNSKL**KTLAIGGWNFGTAPFTTMVSTSQNRQTFITSVIKFL  
RQYGFGLDLWEYPGSRGSPQDKHLFTVLVKEMREAFEQEAIENRPRLMV  
TAAVAGGISNIQAGYEIPELSKYLDFIHVMTYDLHGSWEGYTGENSPLYKYPT  
ETGSNAYLNVDYVMNYWKNNGAPAEKLIVGFPEYGHFTFILRNPSDNGIGAPTS  
GDGPAGPYTRQAGFWAYYEICTFLRSGATEVWDASQEVYAYKANEWLGYDNI  
KSFSVKAQWLKQNNFGGAMIWAIDLDDFTGSFCDQGFPLTSTLNKALGISTE  
GCTAPDVPSEPVTTTPPGSGSGGGSSGGSSGGSGFCAD**KADGLYPVADDRNAFW**  
**QC**INGITYQQHCQAGLVFDTSCNCCNWP

Supplementary Fig. S3. Locations and sequences of the antigens used for the anti N-terminal or anti C-terminal AMCcase antibody in the mature mouse AMCcase protein. The antigen sequences are shown in red, and the CBD region is underlined. Deduced molecular masses of the CBD is about 5 kDa.

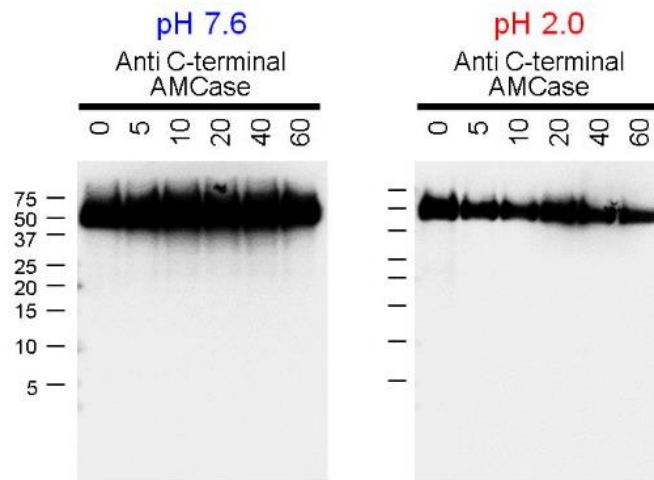

Supplementary Fig. S4. Western blot analysis of the AMCase using anti C-terminal antibody. Soluble proteins obtained from mouse stomach were incubated at 37°C for 0, 5, 10, 20, 40 and 60 min at pH 7.6 or 2.0. The fragments of CBD (about 5 kDa) itself and the 9 kDa containing CBD were not detected at even longer exposure condition.

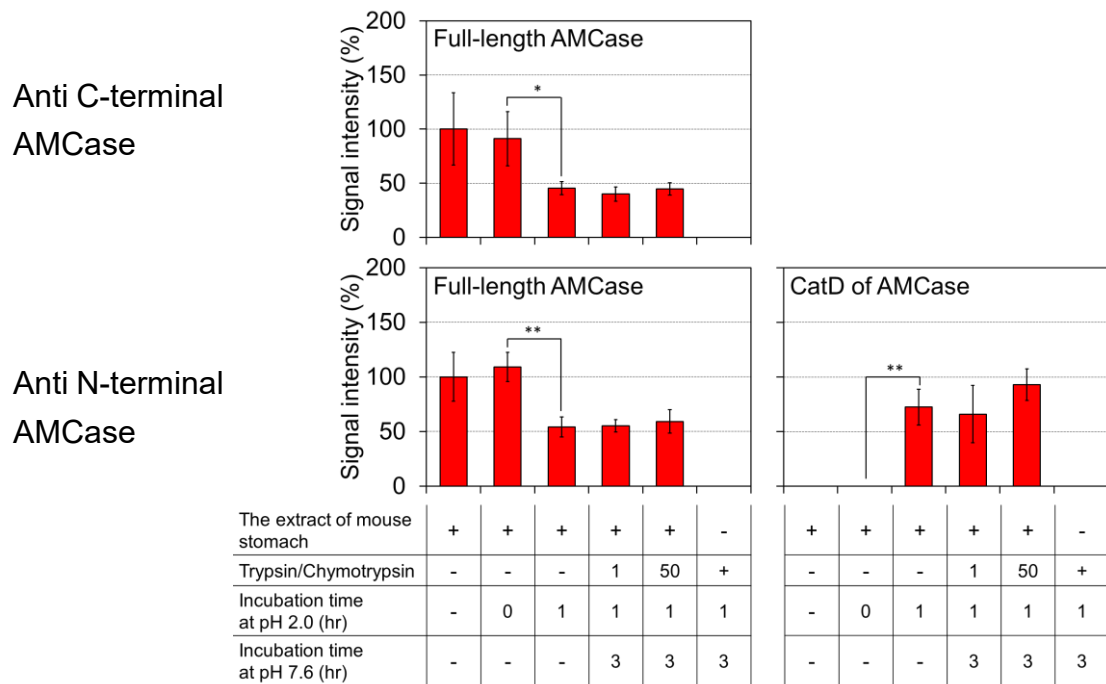

Supplementary Fig. S5. Changes of AMCase protein levels in the Western blot in Fig. 3. The signal intensities in Fig. 3b and c were quantified as described in the Materials and Methods. The signal intensities of full length AMCase at incubated 0 min were defined as 100%. Values represent mean  $\pm$  SD conducted in triplicate. \* $p < 0.05$ , \*\* $p < 0.01$ . P-values were determined using Student's t-test.

GTGGATTCTGTGCCGACAAAGCAGATGGCCTCTACCCTGTGGCAGATGACAGAAATGCT  
**TTTTGGCAGTGCATCAATGGAATCACATAACCAGCAGCATTGTCAAGCAGGGCTTGTTTT**  
**TGATAACCAGCTGTAATTGCTGCAACTGGCCAAGATCTTGGCAACCAGGCCTCTGGCTGG**  
 TGCTCCTCCTCTGGCT**TGCCAAGGCATTGTAGACACAGGCACCTCTCTGCTCGTCATGCC**  
 TGCCCAGTACCTG**AATGAACTTCTGCAGACCATAGGAG**CCCAGGAAGGAGAGTATGGAC  
 AGTATTTTGT***CTCGAG***TGGACTTGGATGACTTCAAGGGTTCCTTCTGCAACCAGGGCCC  
 GTACCCTCTCATCCGGACACTA**CGGCAGGAATAAATCTTCCAT**CCGAGACTCCAAGGA  
 GCCCAGAACAGATA**ATACCTGAGCCACGCCA**TCTTCTATGCCAGAGCAGGGACCCAGC  
 CCAGGGCTA***CTGCAG***GAGCTGAACGGGAAGCTCACTGGCATGGCCTTCCTGTTTCTAC  
 CCCC**AATGTGTCCGTCGTGGATCTGA**CGTGCCGCCTGGAGAAACCTGCCAAGTATGATG  
 ACAT**CAAGAAGGTGGTGAAGCAGG**CATCTGAGGGCCCACTGAAGGGCATCTTGGGCTAC  
 ACT***GCGGCCGC***CGAGCAGGAGATGGCCACTGCCGCATCCTTCTCCTCCCTGGAGAAGAG  
 CTATGAGCTGCCTG**ACGGCCAGGTCATCACTATTG**GCAACGAGCGGTTCCGATGCCCTG  
 AGGC**TCTTTTCAGCCTTCCTTCTTG**GGTATGGAATCCTGTGGCATCCATGAAACTACA  
 TTCAATTCCATCATGAAGTGTGACGTTGACATCCGTAAAGACCTCTATGCCAACACAGT  
 GCTGTCTGGTGGTACCACCATGTACCCA***GAATTC***CCTCCT**GCAGAGACCCTGGAAGTAAA**  
**GTGTCCACTCTACTGAAGAAAATGGAGAACTGGTCACCTTCAAGCCCGGGTGCTGAATC**  
**CTCGGCCTTCTATGGCCCTCTATGCGATGTGTAGCCAGGATTGT**CAGGTGGTCAAGAGG  
 GTTAGTCAAGACTGCCCTCCACCATGCCACCCCTGCGACAAC**CTATCTACATCTAC**  
**CAGCCAC**CTGTCGGCCCC**CAGGGTCTCAACTTCATAG**CAGACCTGTCCAAGAAGCA  
 GAGGCCACGAATGGAGGAAGAAGAAGAGGC**CTACGGATGGATGGACTTTGG**CCGCCTTC  
 TG**CCAGCTCTACCTGAATGAGAAG**GACTACCCACCTGGCTATGCCTTTGATGTGGAGGC  
 CATGAACCTTCCGAGTAGTGGCCTCTG**CTTTGCGGGACTTGTATCCA**TGAT

Supplementary Fig. S6. Nucleotide sequence of the single standard DNA used for real-time PCR. The single standard DNA, 1,349 nucleotides long, contained cDNA fragments of AMCase, pepsinogen C, Chit1, GAPDH,  $\beta$ -actin, gastric intrinsic factor, mucin, gastrin and H<sup>+</sup>/K<sup>+</sup>-ATPase in a one-to-one ratio. The PCR-target regions are shown in bold underline. The restriction sites are shown bold italic. Red, AMCase; green, pepsinogen C; blue, Chit1; purple, GAPDH; orange,  $\beta$ -actin; pastel pink, gastric intrinsic factor; rose berry, mucin; aqua, gastrin; light blue, H<sup>+</sup>/K<sup>+</sup>-ATPase. Calculated molecular mass, 833480.6.

Supplementary Table S1. List of qPCR primers. Gif, gastric intrinsic factor; ATPase, H<sup>+</sup>/K<sup>+</sup>-ATPase.

| Target gene | Fw (5' to 3')          | Rv (5' to 3')          |
|-------------|------------------------|------------------------|
| Gif         | GCAGAGACCCTGGAAGTAAAG  | CATAGAAGGCCGAGGATTCAG  |
| Mucin       | CGATGTGTAGCCAGGATTGT   | GTGGCGTGGTAGATGTAGATAG |
| Gastrin     | CAGGGTCCTCAACACTTCATAG | CCAAAGTCCATCCATCCGTAG  |
| ATPase      | CCAGCTCTACCTGAATGAGAAG | TGGATACAAGTCCCGCAAAG   |
